# Supplementary material for: Primed adaptation tolerates extensive structural and size variations of the CRISPR RNA guide in Haloarcula hispanica
Source: PubMed Central journal article supplement — Nucleic Acids Res. 2019 Apr 8;47(11):5880–91. doi: 10.1093/nar/gkz244 (PMC6582329; doi:10.1093/nar/gkz244), 2019-04-08
Supplement: gkz244_supplemental_file.pdf [file gkz244_supplemental_file.pdf]

**SUPPLEMENTARY DATA FOR**

**Primed adaptation tolerates extensive structural and  
size variations of the CRISPR RNA guide in *Haloarcula  
hispanica***

**Luyao Gong<sup>1,2</sup>, Ming Li<sup>1,\*</sup>, Feiyue Cheng<sup>1,2</sup>, Dahe Zhao<sup>1</sup>, Yihua Chen<sup>1,2</sup> and  
Hua Xiang<sup>1,2,\*</sup>**

<sup>1</sup> *State Key Laboratory of Microbial Resources, Institute of Microbiology, Chinese Academy  
of Sciences, Beijing 100101, China.*

<sup>2</sup> *University of Chinese Academy of Sciences, Beijing 100049, China*

**Summary of supplementary figures and tables:**

**Figure S1** 3' handle is essential for immunity mediated by the v60 spacer.

**Figure S2** CRISPR transcription ended at either of two terminators.

**Figure S3** The stem-loop forming potential of truncated 3' handles.

**Figure S4** Adaptation to HHPV-2 was primed by the v10-crRNAs carrying different 3' handles.

**Figure S5** Verification of the transcription start site (TSS) designed at the very beginning of 5' handle.

**Figure S6** Spacer13 persisted during two spacer loss assays.

**Table S1** Strains and plasmids used in this study.

**Table S2** Oligonucleotides used in this study.

**Table S3** The virus-derived new spacers during adaptation primed by H6-v10-h0.

## SUPPLEMENTARY FIGURES

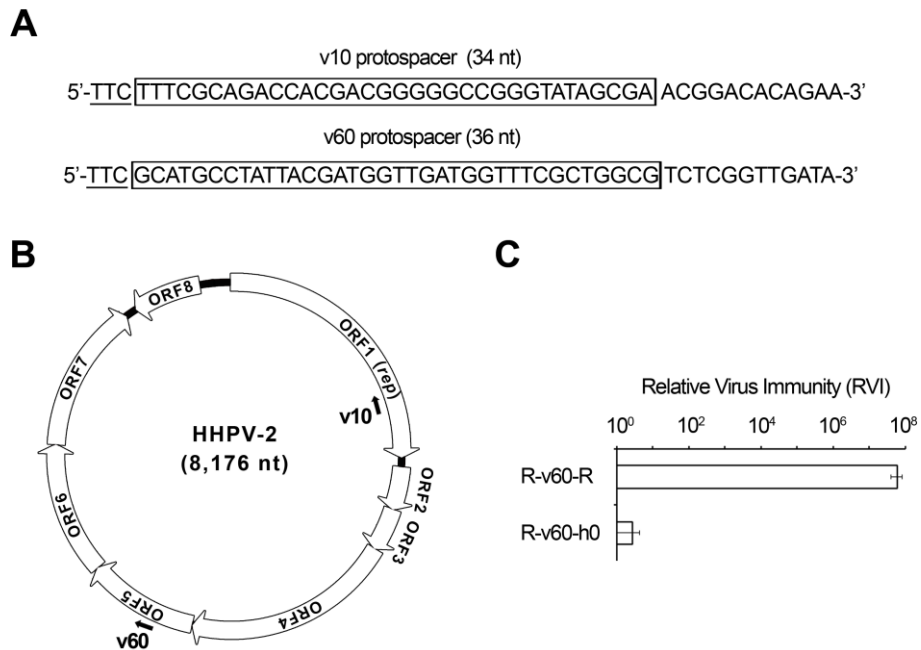

**Figure S1 3' handle is essential for immunity mediated by the v60 spacer. (A)** The sequence of the v10 or v60 protospacer is given, with the PAM nucleotides underlined. 12 downstream nucleotides are also shown. **(B)** The location of v10 and v60 protospacers on the viral genome. **(C)** Intense virus immunity was conferred by R-v60-R, which encodes a canonical crRNA, but not conferred by R-v60-h0, which encodes a 3' handle-lacking crRNA. To get the RVI value, the plaque forming unit (PFU) on Sp1d cells containing the empty pWL502 was divided by the PFU on cells containing a CRISPR-expressing plasmid. Error bars indicate the standard deviation (SD) calculated from three independent replicates.

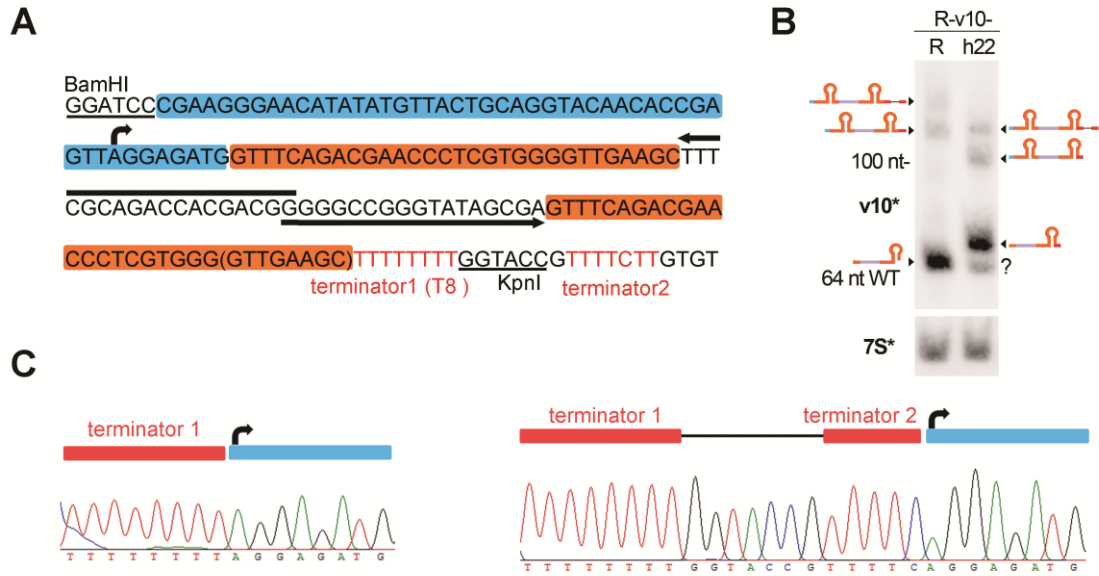

**Figure S2 CRISPR transcription ended at either of two terminators. (A)** Two terminator sequences (in red) in the R-v10-R (with the nucleotides in brackets) and R-v10-h22 (without the nucleotides in brackets) constructs. The promoter, 5'-UTR, and start codon of *phaR* are shaded blue, and the repeat sequences are shaded orange. The two divergent arrows indicate the locations of primers used for CR-RT-PCR analysis. **(B)** Northern analysis of the RNA products from R-v10-R and R-v10-h22 using a v10-specific probe (v10\*). The predicted identity of each RNA product is indicated with cartoons beside the band. The question mark indicates an unexpected RNA product. 7S RNA was probed as the internal control (7S\*). **(C)** CR-RT-PCR analysis identifying the two transcription terminators. Two representative sequencing results of the main PCR products are given. Curved arrows indicate transcription initiation.

**A**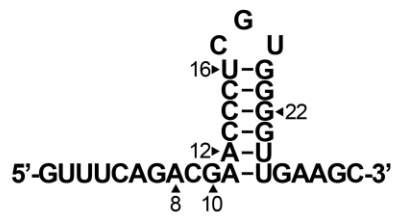**B**

| Constructs | The ribonucleotides 3' of spacer RNA          | MFE (kcal/mol) |
|------------|-----------------------------------------------|----------------|
| R-v10-R    | 5'-GUUUCAGACGAACCCUCGUGGG-3'                  | -3.6           |
| R-v10-h22  | 5'-GUUUCAGACGAACCCUCGUGGG(U) <sub>8</sub> -3' | -7.6           |
| R-v10-h16  | 5'-GUUUCAGACGAACCCU(U) <sub>6</sub> -3'       | 0              |
| R-v10-h12  | 5'-GUUUCAGACGAA(U) <sub>6</sub> -3'           | 0              |
| R-v10-h10  | 5'-GUUUCAGACG(U) <sub>6</sub> -3'             | 0              |
| R-v10-h8   | 5'-GUUUCAGA(U) <sub>6</sub> -3'               | 0              |
| R-v10-h0   | 5'-(U) <sub>6</sub> -3'                       | 0              |
| R-v10-h12m | 5'-ACGGACACAGAA(U) <sub>6</sub> -3'           | 0              |

**Figure S3 The stem-loop forming potential of truncated 3' handles. (A)** The stem-loop forming potential of the WT repeat RNA. Positions relative to the 5' end were given for some nucleotides. **(B)** For each WT or truncated 3' handle, the minimal free energy (MFE) was predicted using the RNAfold web server.

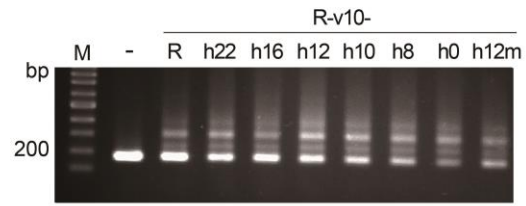

The 2nd PCR analysis; MOI=1:1

**Figure S4 Adaptation to HHPV-2 was primed by the v10-crRNAs carrying different 3' handles.** The adaptation assay was performed as illustrated in [Figure 3A](#), and included two rounds of infection (MOI=1:1). PCR analysis was performed using primers test\_F and test\_R.

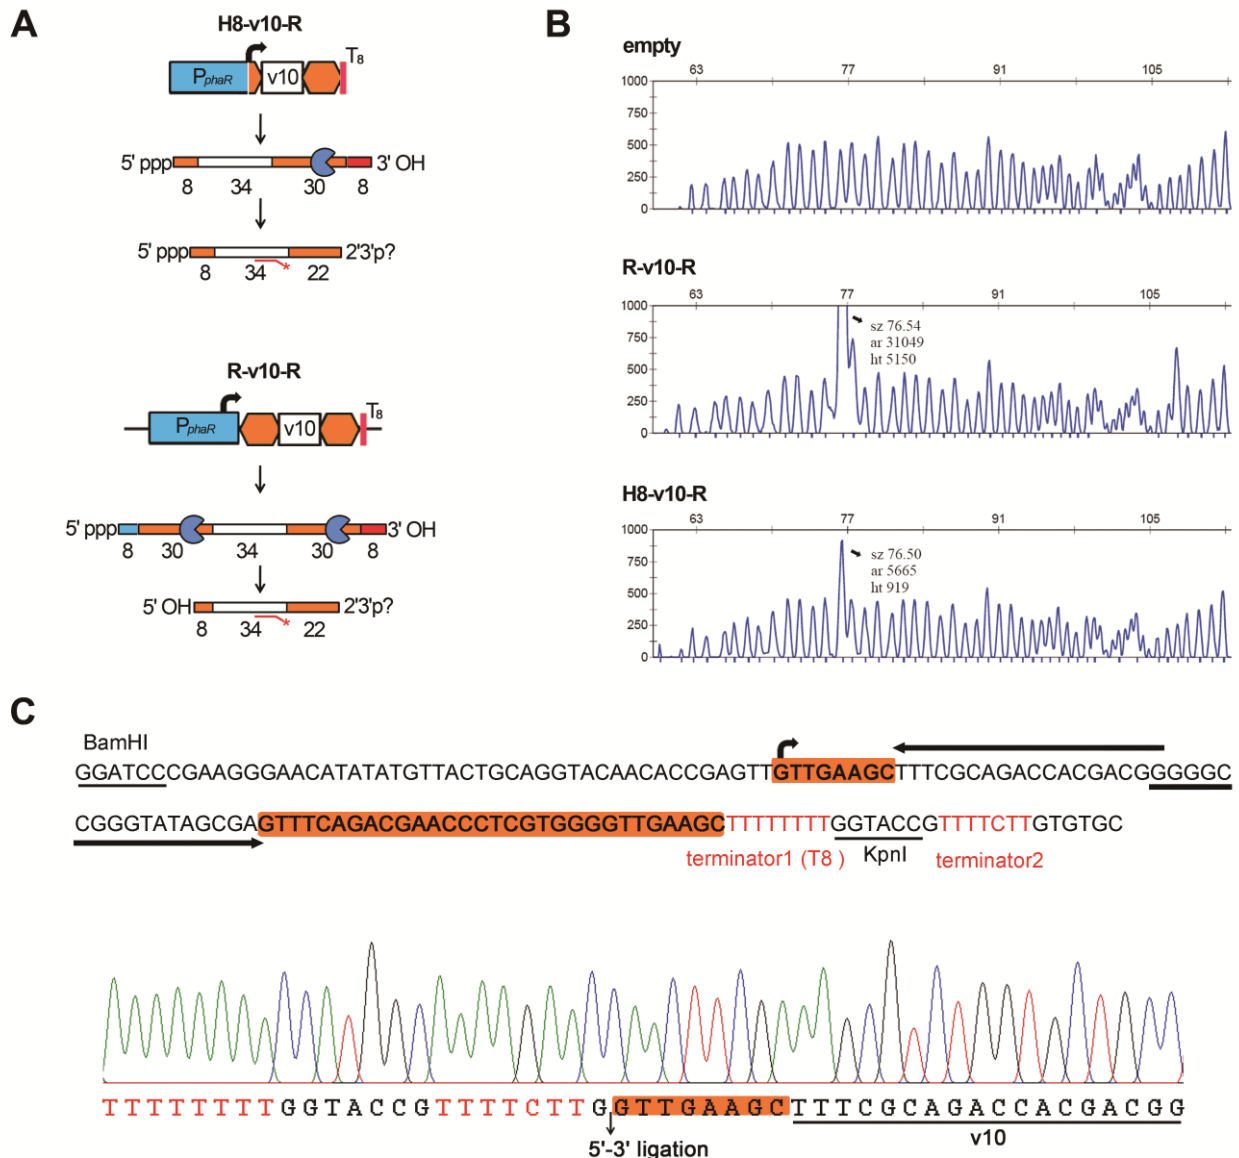

**Figure S5 Verification of the transcription start site (TSS) designed at the very beginning of 5' handle. (A)** Schematic depicting the structure of the H8-v10-R and R-v10-R constructs, and their RNA products. Their primary transcripts are processed by the Cas6 endonuclease to produce mature crRNAs. The location of the 5' FAM (6-carboxyfluorescein)-labeled extension primer (a red line with an asterisk) is indicated beneath the crRNA molecule. **(B)** Primer extension analysis. H8-v10-R and R-v10-R were separately introduced into Sp1d cells, and total RNA was extracted and subjected to reverse transcription using the primer indicated in panel A. The extension products were subjected to fragment analysis using ABI3730xl DNA Analyzer (Thermo Fisher Scientific, MA, USA), and the results were analyzed using GeneMapper 4.1. The consistent location of signal peak indicates the same size of their 5' handle and transcription initiation at the beginning nucleotide of 5' handle in H8-v10-R. **(C)** CR-RT-PCR analysis to confirm the TSS of H8-v10-R. The location of primers is indicated by two long arrows. The curved arrow indicates TSS. The repeat sequence is in bold. The representative sequencing result of PCR products is given.

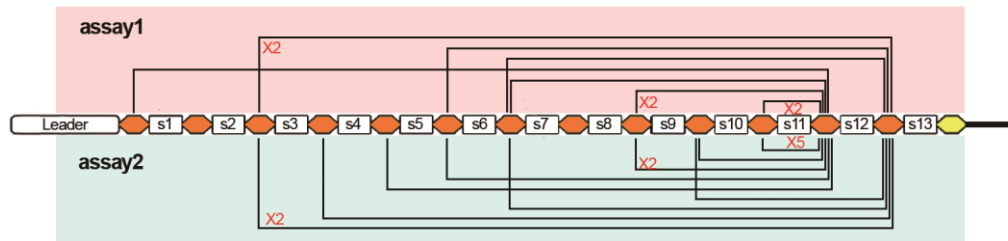

**Figure S6 Spacer13 persisted during two spacer loss assays.** For each assay, a single DF60 colony was inoculated and serially sub-cultured for more than 20 times, and then subjected to the pTTC11 (a modified pWL502 derivative carrying the PAM sequence 5'-TTC-3' and the protospacer of spacer11) challenge under selection pressure. The CRISPR content of the survivors were analyzed by DNA sequencing. Spacer loss events caused by recombination between the consensus repeats (orange) are indicated (with frequency labeled in red), and no recombination events involving the degenerate repeat (yellow) was observed.

**Table S1.** Strains and plasmids used in this study

| Strains/Plasmids                   | Description                                                                                                          | Source or reference |
|------------------------------------|----------------------------------------------------------------------------------------------------------------------|---------------------|
| <b><i>H. hispanica</i> strains</b> |                                                                                                                      |                     |
| DF60                               | <i>pyrF</i> -deleted strain of <i>H. hispanica</i> ATCC 33960                                                        | 34                  |
| Sp1d (or $\Delta$ sp1-14)          | Modified DF60 with its wild-type CRISPR replaced by a mini-CRISPR containing spacer1 followed by a degenerate repeat | 18                  |
| Sp13c                              | Modified DF60 with its wild-type CRISPR replaced by a mini-CRISPR containing spacer13 followed by a consensus repeat | This study          |
| $\Delta$ cas6                      | <i>cas6</i> -deleted mutant of DF60                                                                                  | This study          |
| <b>Plasmids</b>                    |                                                                                                                      |                     |
| pWL502                             | 7.8 kb; expression vector containing a <i>pyrF</i> and its native promoter derived from <i>Haloflex mediterranei</i> | 35                  |
| pTTC1                              | 7.9 kb; modified pWL502 carrying protospacer1 preceded by TTC                                                        | 21                  |
| pTTC11                             | 7.9 kb; modified pWL502 carrying protospacer11 preceded by TTC                                                       | This study          |
| pTTC13                             | 7.9 kb; modified pWL502 carrying protospacer13 preceded by TTC                                                       | This study          |
| pR-v10-R                           | 7.9 kb; modified pWL502 carrying R-v10-R                                                                             | This study          |
| pR-v10-h22                         | 7.9 kb; modified pWL502 carrying R-v10-h22                                                                           | This study          |
| pR-v10-h16                         | 7.9 kb; modified pWL502 carrying R-v10-h16                                                                           | This study          |
| pR-v10-h12                         | 7.9 kb; modified pWL502 carrying R-v10-h12                                                                           | This study          |
| pR-v10-h10                         | 7.9 kb; modified pWL502 carrying R-v10-h10                                                                           | This study          |
| pR-v10-h8                          | 7.9 kb; modified pWL502 carrying R-v10-h8                                                                            | This study          |
| pR-v10-h0                          | 7.9 kb; modified pWL502 carrying R-v10-h0                                                                            | This study          |
| pR-v10-h12m                        | 7.9 kb; modified pWL502 carrying R-v10-h12m                                                                          | This study          |
| pH8-v10-R                          | 7.9 kb; modified pWL502 carrying H8-v10-R                                                                            | This study          |
| pH8-v10-h22                        | 7.9 kb; modified pWL502 carrying H8-v10-h22                                                                          | This study          |
| pH8-v10-h0                         | 7.9 kb; modified pWL502 carrying H8-v10-h0                                                                           | This study          |
| pH7-v10-h0                         | 7.9 kb; modified pWL502 carrying H7-v10-h0                                                                           | This study          |
| pH6-v10-h0                         | 7.9 kb; modified pWL502 carrying H6-v10-h0                                                                           | This study          |
| pH5-v10-h0                         | 7.9 kb; modified pWL502 carrying H5-v10-h0                                                                           | This study          |
| pH4-v10-h0                         | 7.9 kb; modified pWL502 carrying H4-v10-h0                                                                           | This study          |
| pR-16bp-h22                        | 7.9 kb; modified pWL502 carrying R-16bp-h22                                                                          | This study          |
| pR-21bp-h22                        | 7.9 kb; modified pWL502 carrying R-21bp-h22                                                                          | This study          |
| pR-24bp-h22                        | 7.9 kb; modified pWL502 carrying R-24bp-h22                                                                          | This study          |
| pR-28bp-h22                        | 7.9 kb; modified pWL502 carrying R-28bp-h22                                                                          | This study          |
| pR-30bp-h22                        | 7.9 kb; modified pWL502 carrying R-30bp-h22                                                                          | This study          |
| pR-31bp-h22                        | 7.9 kb; modified pWL502 carrying R-31bp-h22                                                                          | This study          |
| pR-32bp-h22                        | 7.9 kb; modified pWL502 carrying R-32bp-h22                                                                          | This study          |
| pR-44bp-h22                        | 7.9 kb; modified pWL502 carrying R-44bp-h22                                                                          | This study          |



---

|             |                                                                                                                 |            |
|-------------|-----------------------------------------------------------------------------------------------------------------|------------|
| pR-60bp-h22 | 7.9 kb; modified pWL502 carrying R-60bp-h22                                                                     | This study |
| pR-72bp-h22 | 7.9 kb; modified pWL502 carrying R-72bp-h22                                                                     | This study |
| pH8-p1-h22  | 7.9 kb; modified pWL502 carrying H8-p1-h22                                                                      | This study |
| pH8-p1-h0   | 7.9 kb; modified pWL502 carrying H8-p1-h0                                                                       | This study |
| pH7-p1-h0   | 7.9 kb; modified pWL502 carrying H7-p1-h0                                                                       | This study |
| pH6-p1-h0   | 7.9 kb; modified pWL502 carrying H6-p1-h0                                                                       | This study |
| pH5-p1-h0   | 7.9 kb; modified pWL502 carrying H5-p1-h0                                                                       | This study |
| pH6M1-p1-h0 | 7.9 kb; modified pWL502 carrying H6M1-p1-h0                                                                     | This study |
| pH6M2-p1-h0 | 7.9 kb; modified pWL502 carrying H6M2-p1-h0                                                                     | This study |
| pH6M3-p1-h0 | 7.9 kb; modified pWL502 carrying H6M3-p1-h0                                                                     | This study |
| pH6M4-p1-h0 | 7.9 kb; modified pWL502 carrying H6M4-p1-h0                                                                     | This study |
| pH6M5-p1-h0 | 7.9 kb; modified pWL502 carrying H6M5-p1-h0                                                                     | This study |
| pH6M6-p1-h0 | 7.9 kb; modified pWL502 carrying H6M6-p1-h0                                                                     | This study |
| pR-v60-h0   | 7.9 kb; modified pWL502 carrying R-v60-h0                                                                       | This study |
| pR-v60-R    | 7.9 kb; modified pWL502 carrying R-v60-R                                                                        | This study |
| pHAR        | 4.0 kb; suicide vector containing <i>pyrF</i> and its native promoter derived from <i>Haloflex mediterranei</i> | 34         |
| pDCAS6      | 5.2 kb; modified pHAR for <i>cas6</i> deletion                                                                  | This study |
| pSP13C      | 5.3 kb; modified pHAR for construction of Sp13c                                                                 | This study |

---

**Table S2.** Oligonucleotides used in this study

| Primer <sup>a</sup>                              | 5'-3' sequence <sup>b</sup>                                                   |
|--------------------------------------------------|-------------------------------------------------------------------------------|
| <b>For strains construction</b>                  |                                                                               |
| Sp13c_UF                                         | CGCGGATCCCTCGCAGACCGGGTACTAT                                                  |
| Sp13c_UR                                         | <b>TGAAACTCTATCGACCAGCGCGAAGTAAGACTGTGTGTGCCGAGCT</b><br>TCAACCCACGAG         |
| Sp13c_DF                                         | <b>CGCGCTGGTCGATAGAGTTTCAGACGAACCCTCGTGGGGTTGAAG</b><br>CTACGTCAGTGCTC        |
| Sp13c_DR                                         | CGGGGTACCGGGCTTGCCGACTGAA                                                     |
| DCAS6_UF                                         | CGCGGATCCCGAGCAAGGCGCAATAGAT                                                  |
| DCAS6_UR                                         | <b>TGATTTGTGGTTGGCCACTACACGCACTCGGATGAC</b>                                   |
| DCAS6_DF                                         | <b>GTCATCCGAGTGCGTGTAGTGGCCAACCACAAATCA</b>                                   |
| DCAS6_DR                                         | CGGGGTACCCCGGGCCATTGGTACT                                                     |
| <b>For target plasmid construction</b>           |                                                                               |
| TTC11_F                                          | <u>GATCC</u> <u>TTC</u> CTCGCCGCACTGGCTGGTCGCCAGACCCATCACAGG<br><u>TAC</u>    |
| TTC11_R                                          | <u>CTGTGATGGGTCTGGCGACCAGCCAGTGC GGCGAGGAAG</u>                               |
| TTC13_F                                          | <u>GATCC</u> <u>TTC</u> TCGGCACACACAGTCTTACTTCGCGCTGGTCGATAGAG<br><u>GTAC</u> |
| TTC13_R                                          | <u>CTCTATCGACCAGCGCGAAGTAAGACTGTGTGTGCCGAGAAG</u>                             |
| <b>For crRNA expression plasmid construction</b> |                                                                               |
| Pro_F                                            | CGCGGATCCCGAAGGGAACATATATGT                                                   |
| v10_R1                                           | <b>CCCGTCTGGTCTGCGAAAGCTTCAACCCACGAGGG</b>                                    |
| R-v10-h0_R2                                      | CGGGGTACCAAAAAAATCGCTATACCCGGCC <b>CCCGTCTGGTCTG</b><br><b>CGAAAG</b>         |
| R-v10-R_R                                        | CGGGGTACCAAAAAAAGCTTCAACCCACGAGGGTTCGTCTGAAA<br>CTCGCTATACCCG                 |
| R-v10-h22_R                                      | CGGGGTACCAAAAAAACCACGAGGGTTCGTCTGAAACTCGCTAT<br>ACCCGGCCCCCG                  |
| R-v10-h16_R                                      | CGGGGTACCAAAAAAAGGGTTCGTCTGAAACTCGCTATACC                                     |
| R-v10-h12_R                                      | CGGGGTACCAAAAAAATTCGTCTGAAACTCGCTATACC                                        |
| R-v10-h10_R                                      | CGGGGTACCAAAAAAACGTCTGAAACTCGCTATACC                                          |
| R-v10-h8_R                                       | CGGGGTACCAAAAAAATCTGAAACTCGCTATAC                                             |
| R-v10-h12m_R                                     | CGGGGTACCAAAAAAATTCGTGTCCGTTTCGTATACCCGGCC                                    |
| H8-v10-h0_R1                                     | <b>TCGCTATACCCGGCCCCCGTCTGGTCTGCGAAAGCTTCAACA</b> ACT<br>CGGTGTTGTACCT        |
| H7-v10-h0_R1                                     | <b>GTCGTGGTCTGCGAAAGCTTCAA</b> ACTCGGTGTTGTACCTG                              |
| H6-v10-h0_R1                                     | <b>GTCGTGGTCTGCGAAAGCTTCAA</b> ACTCGGTGTTGTACCTG                              |
| H5-v10-h0_R1                                     | <b>GTCGTGGTCTGCGAAAGCTTCAA</b> ACTCGGTGTTGTACCTG                              |
| H4-v10-h0_R1                                     | <b>GTCGTGGTCTGCGAAAGCTTAA</b> ACTCGGTGTTGTACCTG                               |
| R-16bp-h22_R                                     | CGGGGTACCAAAAAAACCACGAGGGTTCGTCTGAAACGTCGTG<br>GTCTGCG                        |
| R-21bp-h22_R                                     | CGGGGTACCAAAAAAACCACGAGGGTTCGTCTGAAACCCCCCG<br>TCGTGGTCTGC                    |

---

|               |                                                                              |
|---------------|------------------------------------------------------------------------------|
| R-24bp-h22_R  | CGGGGTACC <del>AAAAAAA</del> ACCCACGAGGGTTCGTCTGAAACCGGCC<br>CCGTCGTGG       |
| R-28bp-h22_R  | CGGGGTACC <del>AAAAAAA</del> ACCCACGAGGGTTCGTCTGAAACTACCCGG<br>CCCCGTC       |
| R-30bp-h22_R  | CGGGGTACC <del>AAAAAAA</del> ACCCACGAGGGTTCGTCTGAAACTATACCC<br>GGCCCCCG      |
| R-31bp-h22_R  | CGGGGTACC <del>AAAAAAA</del> ACCCACGAGGGTTCGTCTGAAACCTATACC<br>CGGCCCCCG     |
| R-32bp-h22_R  | CGGGGTACC <del>AAAAAAA</del> ACCCACGAGGGTTCGTCTGAAACGCTATAC<br>CCGGCCCC      |
| R-44bp-h22_R  | CGGGGTACC <del>AAAAAAA</del> ACCCACGAGGGTTCGTCTGAAACCTGTGTC<br>CGTTCGCTATACC |
| R-60bp-h22_R1 | CGGGGTACC <del>AAAAAAA</del> ACCCACGAGGGTTCGTCTGAAACGTTCTG<br>ATTCTGTGTCGG   |
| R-60bp-h22_R2 | CGGGGTACC <del>AAAAAAA</del> ACCCACGAGGGTTCGTCTGAAACCTGAAG<br>TTCCTGATTCTGT  |
| R-72bp-h22_R1 | CGGGGTACC <del>AAAAAAA</del> ACCCACGAGGGTTCGTCTGAAACGTTGCC<br>CTGAAGTTCCTG   |
| R-72bp-h22_R2 | CGGGGTACC <del>AAAAAAA</del> ACCCACGAGGGTTCGTCTGAAACTCTGCTG<br>TTGCCCTGAAG   |
| H8-p1-h22_R1  | TTTGAGTCGCTTCGCCGCCTGTCCCGCAGCCTTGTGCTTCAACAA<br>CTCGGTGTTGTAC               |
| H8-p1-h22_R2  | CGGGGTACC <del>AAAAAAA</del> ACCCACGAGGGTTCGTCTGAAACTTTGAGT<br>CGCTTCGCC     |
| H8-p1-h0_R2   | CGGGGTACC <del>AAAAAAA</del> TTTGAGTCGCTTCGCC                                |
| H7-p1-h0_R1   | TTTGAGTCGCTTCGCCGCCTGTCCCGCAGCCTTGTGCTTCAAAC<br>TCGGTGTGT                    |
| H6-p1-h0_R1   | TTTGAGTCGCTTCGCCGCCTGTCCCGCAGCCTTGTGCTTCAAAC<br>CGGTGTTGT                    |
| H5-p1-h0_R1   | TTTGAGTCGCTTCGCCGCCTGTCCCGCAGCCTTGTGCTTCAAAC<br>GGTGTGT                      |
| H6M1-p1-h0_R1 | TTTGAGTCGCTTCGCCGCCTGTCCCGCAGCCTTGTCTTCAAAC<br>CGGTGTTGT                     |
| H6M2-p1-h0_R1 | TTTGAGTCGCTTCGCCGCCTGTCCCGCAGCCTTGTGCGATTCAAAC<br>CGGTGTTGT                  |
| H6M3-p1-h0_R1 | TTTGAGTCGCTTCGCCGCCTGTCCCGCAGCCTTGTGCGGTCAAAC<br>CGGTGTTGT                   |
| H6M4-p1-h0_R1 | TTTGAGTCGCTTCGCCGCCTGTCCCGCAGCCTTGTGCTGCAAAC<br>CGGTGTTGT                    |
| H6M5-p1-h0_R1 | TTTGAGTCGCTTCGCCGCCTGTCCCGCAGCCTTGTGCTTAAAC<br>CGGTGTTGT                     |
| H6M6-p1-h0_R1 | TTTGAGTCGCTTCGCCGCCTGTCCCGCAGCCTTGTGCTTCAAAC<br>CGGTGTTGT                    |
| v60_R1        | AATAGGCATGCGCTTCAACCCACGAGGGTTCGTCTGAAACCATCT                                |

---

---

|                                  |                                                                                                                                 |
|----------------------------------|---------------------------------------------------------------------------------------------------------------------------------|
|                                  | CCTAACTCGGTGT                                                                                                                   |
| R-v60-h0_R2                      | CGGGGTACC <span style="border: 1px solid black; padding: 0 2px;">AAAAAA</span> ACGCCAGCGAAACCATCAACCATCGTAATA<br><b>GGCATGC</b> |
| R-v60-R                          | CGGGGTACC <span style="border: 1px solid black; padding: 0 2px;">AAAAAA</span> AGCTTCAACCCCACGAGGGTTCGTCTGAAA<br>CCGCCAGCGAAAC  |
| <b>Adaptation analysis</b>       |                                                                                                                                 |
| test_F                           | CGCGGATCC <span style="border: 1px solid black; padding: 0 2px;">TCGGTTTCCGTCGAC</span>                                         |
| test_R                           | CGGGGTACC <span style="border: 1px solid black; padding: 0 2px;">CGGAGGCGATGACTGATG</span>                                      |
| <b>Northern analysis</b>         |                                                                                                                                 |
| 7S-probe-biotin                  | GGGGCGTCCGGTCTGA                                                                                                                |
| s1-probe-biotin                  | TGACTGATGGCAGAAAGCAA                                                                                                            |
| s13-probe-biotin                 | CGACCAGCGCGAAGTAA                                                                                                               |
| v10-probe-biotin                 | CCGTCGTGGTCTGCGAAA                                                                                                              |
| <b>CR-RT-PCR analysis</b>        |                                                                                                                                 |
| CR-RT_F                          | GGGGCCGGGTATAGCGA                                                                                                               |
| CR-RT_R                          | CCGTCGTGGTCTGCGAAA                                                                                                              |
| <b>Primer extension analysis</b> |                                                                                                                                 |
| FAM-v10                          | TTCTGCTGTTGCCCTGAAGTTCTGATTCTGTGTCCGTTGCTATA<br>CCCGGCCCCCGT                                                                    |

---

<sup>a</sup> Forward and reverse primers are respectively indicated with letters F and R. UF/UR and DF/DR are primers respectively for the upstream and downstream fragments, which were subsequently linked by bridge PCR reactions. R1 and R2 primers contain overlapping sequences that are designed for overlap extension PCR.

<sup>b</sup> Restriction endonuclease cut sites are underlined. Complementary sequences within UR and DF primers (for construction of CRISPR variant strains), and overlapping sequences within R1 and R2 primers (for construction of crRNA-expressing plasmids), are indicated in bold. Restriction endonuclease cut sites of BamHI or KpnI are underlined. The mutated nucleotides in primers for 5' handle single mutation are in red. The designed PAM nucleotides are shown in box.

**Table S3.** The virus-derived new spacers during adaptation primed by H6-v10-h0

| <b>New spacer sequences</b>           | <b>Positions<sup>a</sup></b> | <b>Strand<sup>b</sup></b> | <b>PAM</b> |
|---------------------------------------|------------------------------|---------------------------|------------|
| CCTTCGGCAATAGCTTCAGACGCAACGTCAGTATC   | 1715-1681                    | -                         | TTC        |
| CGGGTCTGTACCTGTCTGAATCGGTCCCTGACGAAA  | 72-106                       | +                         | TTC        |
| GACGGGCTATCATCACCATTCTCAGATGCAAACACA  | 4566-4531                    | -                         | TTC        |
| ACTATCGAAACACAGGCGTTTACGATTATTCGGTC   | 5866-5900                    | +                         | TTC        |
| AGGGAACGACTCATCTTCATTCCACGATCCGAAGA   | 1165-1131                    | -                         | TTC        |
| GCCCAGCTCAACAACGCCGTAATCACCAGCATCAGGG | 5764-5728                    | -                         | TTC        |
| ATGCTACCCGCTCCGGATCAACCGTACGGCCAGCCA  | 2885-2850                    | -                         | TTC        |
| GAGATCATCAAGCGCAGCGCCCGCATCTCGCAA     | 1510-1476                    | -                         | TTC        |
| AGGATGAGCTGGGCGAGTTGCAAGATGATGAGTTC   | 6017-6051                    | +                         | TTC        |
| GATGCTCGGACTAATCGGCGTGAAGTTGCTGTGCAG  | 6834-6869                    | +                         | TTC        |

<sup>a</sup>The positions of protospacers (from which a spacer was derived) on the HHPV-2 genome.

<sup>b</sup> '+' and '-' correspond respectively to the coding strand and the template strand of the *rep* gene (ORF1).
